# Supplementary material for: Variable window binding for mutually exclusive alternative splicing
Source: PubMed Central journal article supplement (PMC1431710; doi:10.1186/gb-2006-7-1-r2), 2006-01-13
Supplement: gb-2006-7-1-r2-S1.pdf [file gb-2006-7-1-r2-S1.pdf]

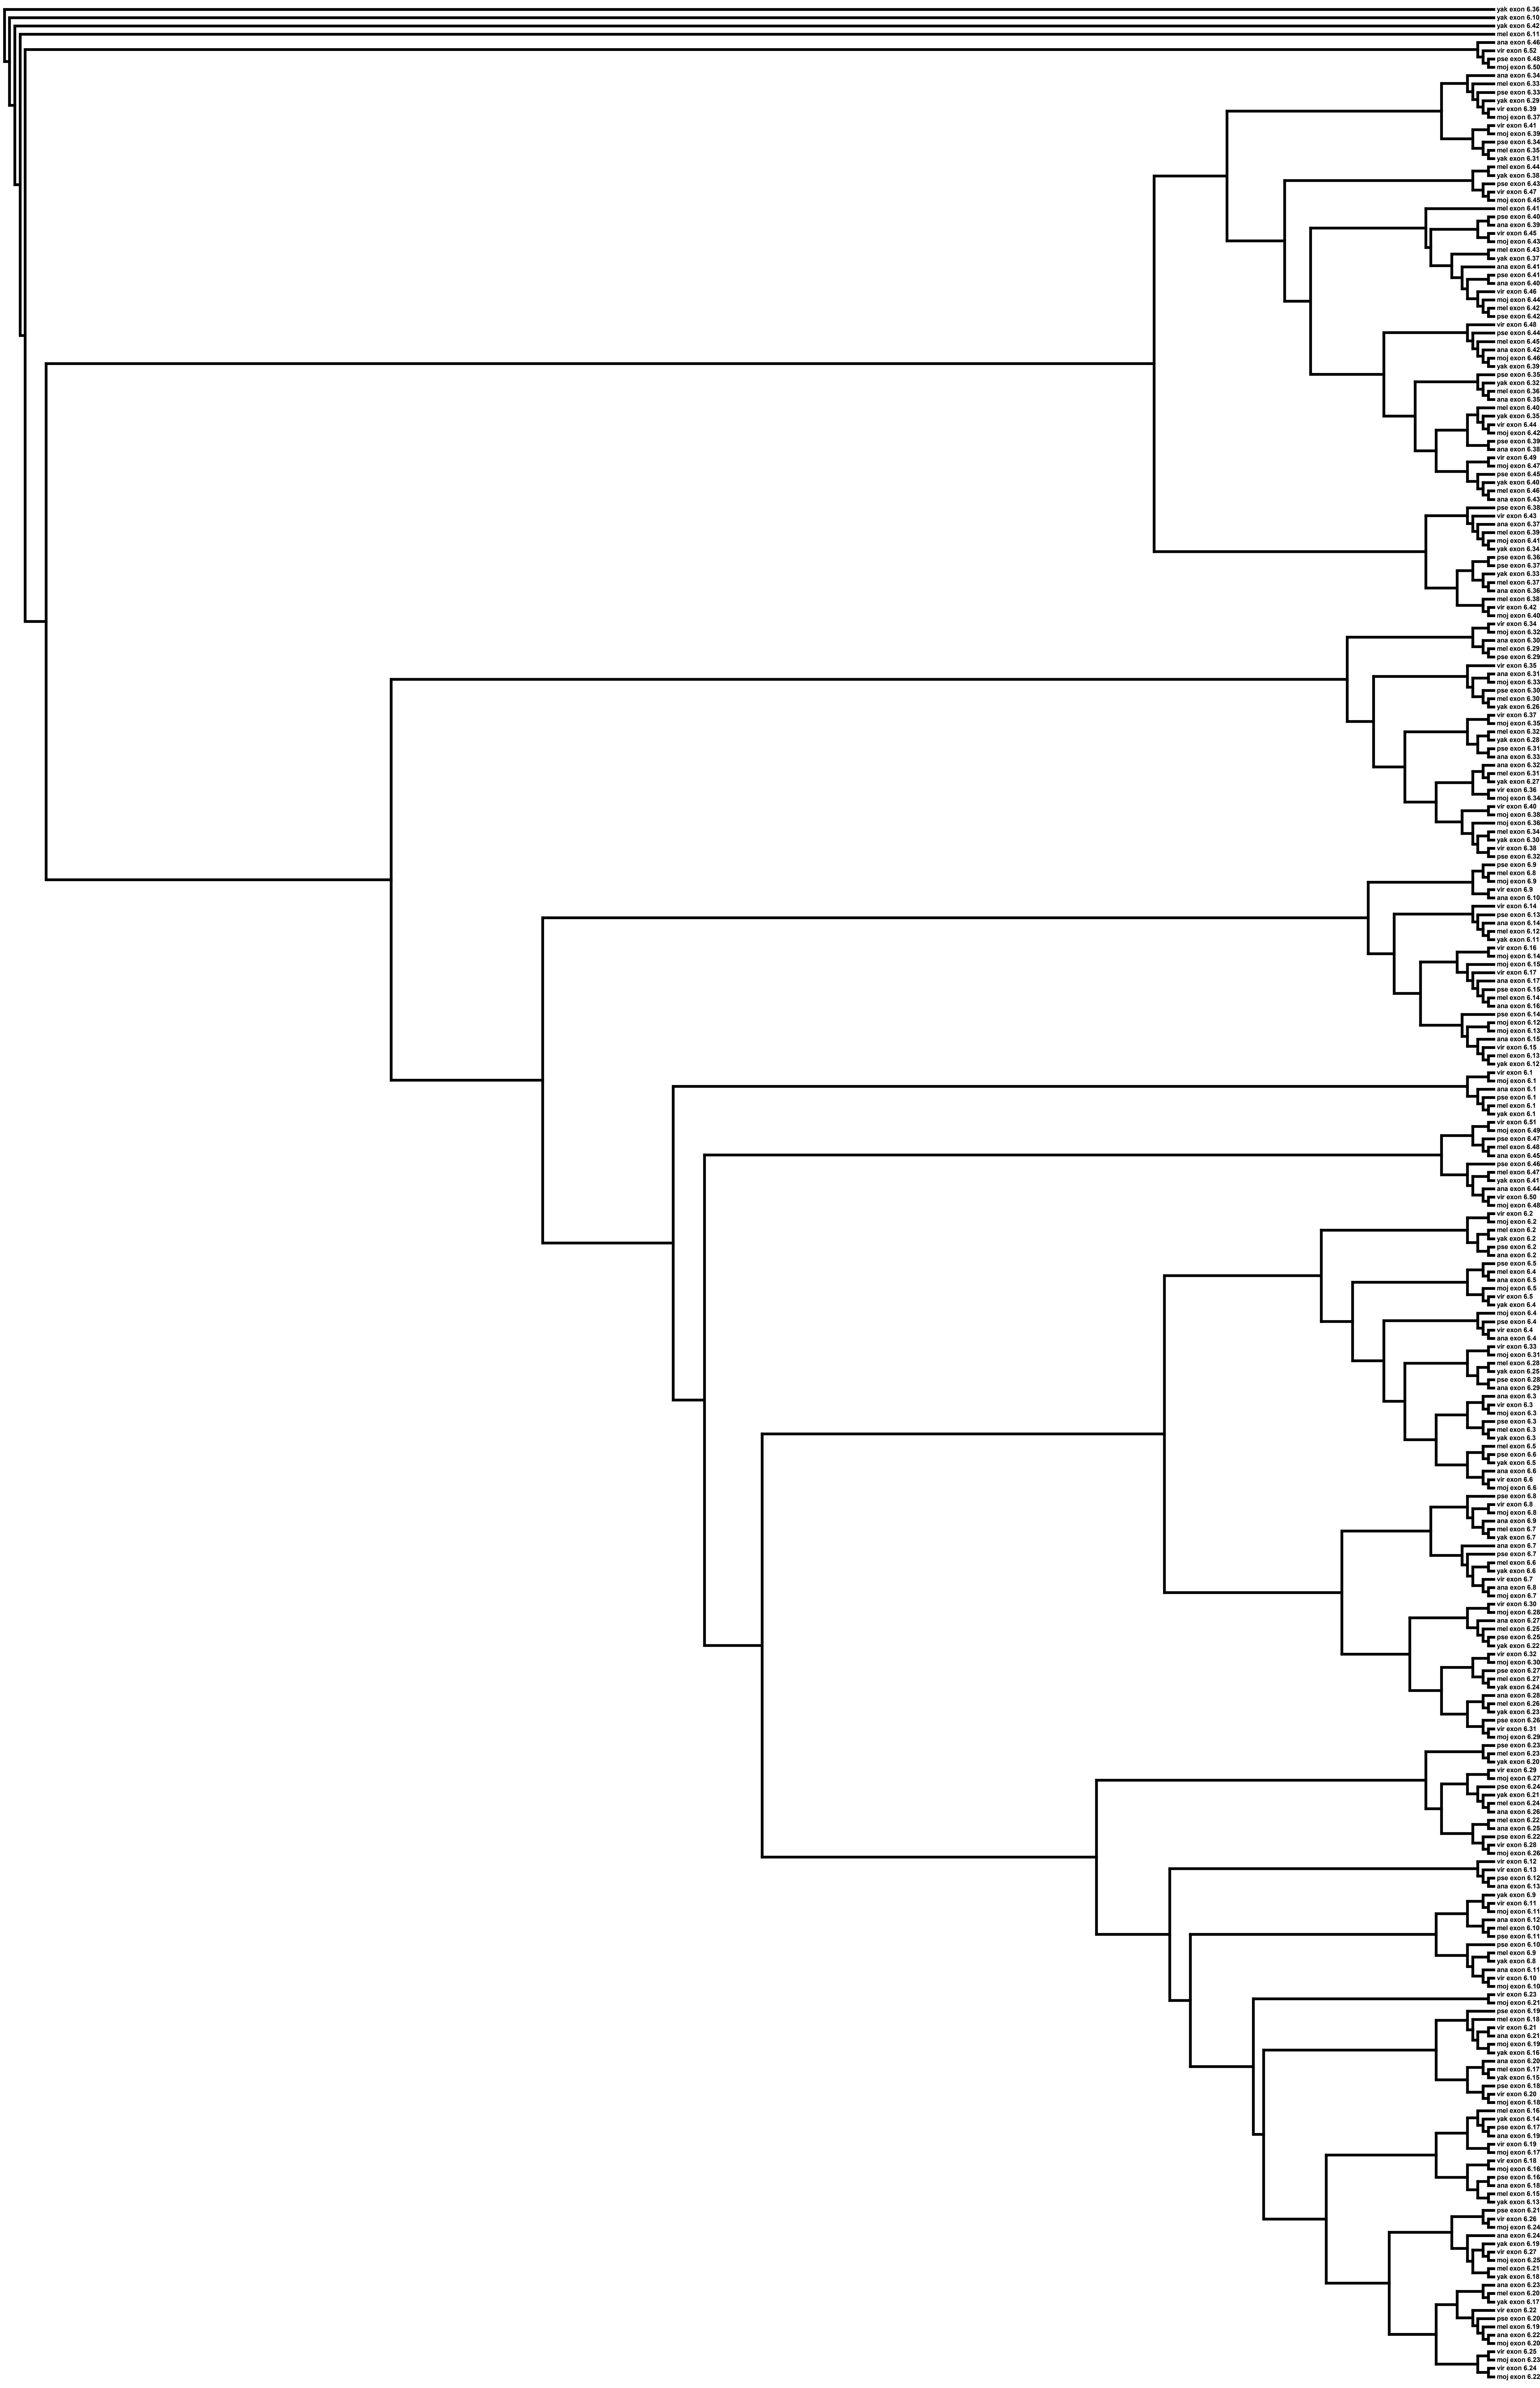

yak exon 6.36  
yak exon 6.10  
mel exon 6.11  
ana exon 6.46  
vir exon 6.52  
pse exon 6.48  
moj exon 6.50  
ana exon 6.34  
mel exon 6.33  
pse exon 6.33  
yak exon 6.39  
moj exon 6.37  
vir exon 6.41  
moj exon 6.39  
pse exon 6.34  
mel exon 6.35  
yak exon 6.31  
mel exon 6.44  
yak exon 6.38  
pse exon 6.43  
vir exon 6.47  
moj exon 6.45  
mel exon 6.41  
pse exon 6.40  
ana exon 6.39  
vir exon 6.45  
mel exon 6.43  
yak exon 6.37  
pse exon 6.41  
ana exon 6.40  
vir exon 6.42  
moj exon 6.44  
mel exon 6.42  
pse exon 6.32  
vir exon 6.48  
pse exon 6.44  
mel exon 6.42  
ana exon 6.42  
moj exon 6.46  
pse exon 6.35  
yak exon 6.32  
mel exon 6.36  
ana exon 6.35  
mel exon 6.40  
yak exon 6.35  
vir exon 6.44  
moj exon 6.42  
pse exon 6.39  
ana exon 6.38  
vir exon 6.49  
moj exon 6.47  
pse exon 6.45  
yak exon 6.40  
mel exon 6.46  
ana exon 6.43  
pse exon 6.38  
vir exon 6.43  
moj exon 6.41  
yak exon 6.34  
pse exon 6.36  
pse exon 6.37  
yak exon 6.33  
mel exon 6.37  
ana exon 6.36  
mel exon 6.36  
vir exon 6.39  
moj exon 6.42  
moj exon 6.40  
vir exon 6.34  
moj exon 6.32  
ana exon 6.30  
mel exon 6.29  
pse exon 6.29  
vir exon 6.35  
ana exon 6.31  
moj exon 6.33  
pse exon 6.30  
mel exon 6.30  
yak exon 6.26  
vir exon 6.37  
moj exon 6.35  
mel exon 6.32  
yak exon 6.28  
pse exon 6.31  
ana exon 6.33  
ana exon 6.32  
mel exon 6.31  
yak exon 6.27  
vir exon 6.36  
moj exon 6.34  
vir exon 6.40  
moj exon 6.36  
moj exon 6.36  
mel exon 6.34  
yak exon 6.30  
vir exon 6.38  
pse exon 6.32  
pse exon 6.9  
mel exon 6.8  
moj exon 6.9  
vir exon 6.9  
ana exon 6.10  
vir exon 6.14  
pse exon 6.13  
ana exon 6.14  
mel exon 6.12  
yak exon 6.11  
vir exon 6.16  
moj exon 6.14  
pse exon 6.15  
vir exon 6.17  
ana exon 6.17  
mel exon 6.15  
mel exon 6.14  
ana exon 6.16  
pse exon 6.14  
moj exon 6.12  
moj exon 6.13  
ana exon 6.15  
vir exon 6.15  
mel exon 6.13  
yak exon 6.12  
vir exon 6.1  
moj exon 6.1  
ana exon 6.1  
pse exon 6.1  
mel exon 6.1  
yak exon 6.1  
vir exon 6.51  
moj exon 6.49  
pse exon 6.47  
mel exon 6.48  
ana exon 6.45  
pse exon 6.46  
mel exon 6.47  
yak exon 6.41  
ana exon 6.44  
vir exon 6.50  
moj exon 6.46  
vir exon 6.2  
moj exon 6.2  
moj exon 6.2  
yak exon 6.2  
pse exon 6.2  
ana exon 6.2  
pse exon 6.5  
mel exon 6.4  
ana exon 6.5  
moj exon 6.5  
vir exon 6.5  
yak exon 6.4  
moj exon 6.4  
pse exon 6.4  
vir exon 6.4  
ana exon 6.4  
vir exon 6.33  
moj exon 6.31  
mel exon 6.28  
yak exon 6.25  
pse exon 6.28  
ana exon 6.29  
ana exon 6.3  
vir exon 6.3  
moj exon 6.3  
mel exon 6.3  
yak exon 6.3  
pse exon 6.6  
yak exon 6.5  
ana exon 6.6  
vir exon 6.6  
moj exon 6.6  
pse exon 6.6  
vir exon 6.8  
moj exon 6.8  
mel exon 6.8  
ana exon 6.8  
mel exon 6.7  
yak exon 6.7  
ana exon 6.7  
pse exon 6.7  
mel exon 6.6  
yak exon 6.6  
vir exon 6.7  
ana exon 6.8  
moj exon 6.7  
vir exon 6.30  
moj exon 6.28  
ana exon 6.27  
mel exon 6.27  
pse exon 6.25  
yak exon 6.22  
vir exon 6.32  
moj exon 6.30  
pse exon 6.27  
mel exon 6.27  
yak exon 6.24  
ana exon 6.28  
mel exon 6.26  
yak exon 6.23  
pse exon 6.26  
vir exon 6.31  
moj exon 6.29  
pse exon 6.23  
mel exon 6.23  
yak exon 6.20  
vir exon 6.29  
moj exon 6.27  
pse exon 6.24  
yak exon 6.21  
mel exon 6.24  
ana exon 6.26  
mel exon 6.22  
ana exon 6.25  
pse exon 6.22  
vir exon 6.28  
moj exon 6.26  
vir exon 6.12  
vir exon 6.13  
pse exon 6.12  
ana exon 6.13  
moj exon 6.11  
yak exon 6.9  
ana exon 6.12  
mel exon 6.10  
pse exon 6.11  
yak exon 6.8  
ana exon 6.10  
moj exon 6.10  
vir exon 6.23  
moj exon 6.21  
pse exon 6.19  
mel exon 6.19  
vir exon 6.21  
ana exon 6.21  
moj exon 6.19  
yak exon 6.16  
ana exon 6.20  
mel exon 6.17  
yak exon 6.15  
pse exon 6.18  
vir exon 6.20  
moj exon 6.18  
mel exon 6.16  
yak exon 6.14  
pse exon 6.17  
ana exon 6.19  
vir exon 6.19  
moj exon 6.17  
vir exon 6.18  
moj exon 6.16  
pse exon 6.16  
ana exon 6.18  
mel exon 6.18  
yak exon 6.13  
pse exon 6.21  
vir exon 6.26  
moj exon 6.24  
yak exon 6.19  
vir exon 6.27  
moj exon 6.25  
mel exon 6.21  
yak exon 6.18  
ana exon 6.23  
mel exon 6.20  
pse exon 6.17  
vir exon 6.22  
pse exon 6.20  
mel exon 6.19  
moj exon 6.22  
moj exon 6.20  
vir exon 6.25  
moj exon 6.23  
vir exon 6.24  
moj exon 6.22
