# Supplementary material for: Variable window binding for mutually exclusive alternative splicing
Source: PubMed Central journal article supplement (PMC1431710; doi:10.1186/gb-2006-7-1-r2), 2006-01-13
Supplement: gb-2006-7-1-r2-S2.pdf [file gb-2006-7-1-r2-S2.pdf]

| EXON NUMBER | ALIGNED SEQUENCE                                                                                                                                                                                    | ALIGNMENT SCORE |
|-------------|-----------------------------------------------------------------------------------------------------------------------------------------------------------------------------------------------------|-----------------|
| 1           | TGTCGAGTACCCATC-CCAACATTCAGGCAGTTTCAATTT<br>TATTCCTCCTTTGAACTGCCTCAAGGTAAGTCACTTCACATCCACTTCCATATCTTCAACAAAT-GGCATTTACTATGTAAGGCTATTAACCTTTGAACTATATTTTCGCTTCAATTCACAG                              | 10              |
| 2           | TTGTCGAGTACCCATC-CCAACATTCAGGCAGTTTCAATTT<br>TTTTAGGTAGGACTAATATCCATCCAG-ACCC-AGACCAACTTGC-GCCAGTTTCAATTTGAGATTTGTCGCTTAGTTGTTATTAGCATAATCCAGCATAATAGTCTTCTCTTTCAAG                                 | 15              |
| 3           | TTGTCGAGTACCCATC-CCAACATTCAGGCAGTTTCAATTT<br>TGTCAGCTCAATCATATCCAGTCCAGTCTTTAGGTAAGACATACGCCCATCTGCCTATCCCAACTTGAAGGTTCCTTTGAGAATTAATATTGGGTTCCCTCTCGAAATCCCAG                                      | 11              |
| 4           | TTGTCGAGTACCCATC-CCAACATTCAGGCAGTTTCAATTT<br>AACTCTTCTCTGCCCGGCTCAGGCTTATCCGGTCCCTTCTTTAGGTAACCCAA-CCCAACTTAGGCTTATATATGTAGATTACGTTTCCGGTCTATTAATATGCCGAATTCACAG                                    | 12              |
| 5           | TTGTCGAGTACCCATC-CCAACATTCAGGCAGTTTCAATTT<br>TGTCGAGTCAAGCCTATCCAGTCCCTTCTTTAGGTAACAACTCCCTAATTTTATGCCCAAC-TCAGGCAGGGTCTAGAATCTAAAAGTTAATTTTTATGTAAACCTCCTTTAAG                                     | 14              |
| 6           | TTGTCGAGTACCCATC-CCAACATTCAGGCAGTTTCAATTT<br>GTGCCGTGTATAGGTAATAACAGCTCTTTTATTTCAGTC-AGT-CCCT-TCCCATC-T-CAGGCACAAAATGATCTTGTAGTGGTTGAACTAGAATCCCTAATTTCTCTCTTATAG                                   | 12              |
| 7           | TTGTCGAGTACCCATC-CCAACATTCAGGCAGTTTCAATTT<br>GCGTATCCACAGCCTTTCTTTAGTAAAAGCTCCACAAGAATATCCCTGACTTTCACATTC-GGCAGTTTCAATTTGAGTTAGGAATCTTGTACGAAATGAAACGAATTTAACCTTCGAG                                | 13              |
| 8           | TTGTCGAGTACCCATC-CCAACATTCAGGCAGTTTCAATTT<br>CTATGTCCAGCTCAGGCATATCCAGCATAATCTAGTAACCTTCAACTCCTAGGCCCAACTCAAGAAAAGATACCTGCTTCTACATGGGATAGCTAATTTTCGATTTTGTAG                                        | 12              |
| 9           | TTGTCGAGTACCCATC-CCAACATTCAGGCAGTTTCAATTT<br>GTCCGGTACAATCGTATCCCATGCCTGTTTTCAAGTAAGATTCACTGAGGTTTTACTTTAAATTAATCCAAACACATTCAGTCAGTTG-CAATTAAGGAAAAAATCTTTAAATTTTAG                                 | 13              |
| 10          | TTGTCGAGTACCCATC-CCAACATTCAGGCAGTTTCAATTT<br>CTCCTGTGCATGGCTCAGTCGATCCTACCCCGTCCCTCAGGTTGGTTTCCCAACATCATCATCAGCAGTTTCTCTGTCTTCCGTGACTCCTCTGATGTTTTCGCCGTAG                                          | 15              |
| 11          | TTGTCGAGTACCCATC-CCAACATTCAGGCAGTTTCAATTT<br>TTCCAGGGAATCGGAATCGCTCTACTGTGTCCGGCCAGTCATATCCGATTCAGCCACAGGTTTGCATGCCATCAATTTGGAACTTTATAATTTACAGGGCGGATTCGAATTCAG                                     | 8               |
| 12          | TTGTCGAGTACCCATC-CCAACATTCAGGCAGTTTCAATTT<br>CATCCAGACATATCCCTTCCCGTGTAGGTAGGTAGTCTTACTTGTCTCAACTTCCAACATTTGGGCAGATTTCTGGGTATATATCCAGTCTTAAAGTCTTATGTTTCGCTCAG                                      | 14              |
| 13          | TTGTCGAGTACCCATC-CCAACATTCAGGCAGTTTCAATTT<br>GCCCTGGTCAGGCATTTCCAGTACCCATTAACAGGTAATACGTAGCCATCCCAACCAATTCAGACTGTTTTTTTTTTTATTGGACATCTGAGGATTTCAATATACTTCATATCCAG                                   | 13              |
| 14          | TTGTCGAGTACCCATC-CCAACATTCAGGCAGTTTCAATTT<br>TCCCGTCCAGCATATCCAGTCCGGTCTTAGTGGTGTCTTCTTCTATCCCAAGCATTCAGATAGATGATTTTGGAAATATTTCCCTAATAGTATTGTTTCAACCAATCAG                                          | 13              |
| 15          | TTGTCGAGTACCCATC-CCAACATTCAGGCAGTTTCAATTT<br>CTCCATGCAATGTCTGGCAGGCATACCCGGTCCCAATTTAGGTTAGTCTCGA-TGCCCTCCCAACATTCATTTGTATGCCGAAGAACTTAAATTTATCTTAAACCCAG                                           | 13              |
| 16          | TTGTCGAGTACCCATC-CCAACATTCAGGCAGTTTCAATTT<br>CCTCCAAGCTCTCATGTCCAGCTCAGTCTGATCCAATGCCGTTCTTTAGGTAATAACCCCTGTCC-AACATTCAGGTATTTCTTAGCATGGCTACTAAGGAGTCAATTTCTCTTAG                                   | 15              |
| 17          | TTGTCGAGTACCCATC-CCAACATTCAGGCAGTTTCAATTT<br>AGTCTTATCCAGTCCCTGCTTCCCGTGTAGTACCCAGTCTGTC-AGGACT-TGTCCAGCACTTAGGCAGTAAATCGAAATCGGCAGATGCCATGACTAAGCTCCCCCTAAATCTTTGTAG                               | 14              |
| 18          | TTGTCGAGTACCCATC-CCAACATTCAGGCAGTTTCAATTT<br>GTCCAGCTCAATCCTTTCCATGCCAAGCGCTCGTAAGCTTTCAGGCAGTTTCTTAAAGAAATCTTCTTAAAGCTCATATGTTTTGGAGATTGATTTAGCACTTGTACTATTTCAG                                    | 14              |
| 19          | TTGTCGAGTACCCATC-CCAACATTCAGGCAGTTTCAATTT<br>CCATGCCAGTTTATAGTAGGAATATCTCTCTGTCTTCCGTCAGGCAGTTTCAAGTTTCTTTAGCTGATAGGTGTCTATAGTACAATACATGCACTTCTTACTGAACCTTTCAG                                      | 15              |
| 20          | TTGTCGAGTACCCATC-CCAACATTCAGGCAGTTTCAATTT<br>CAAGGATTTCCATATCCCGCATTTAGGTAATCACAATGTCTGAGTACAGTCCACAGCCAGGTTTTCATGATTTGGATCATTAGTTGTATCTATACCTCCGATATACCTTCTTACAG                                   | 10              |
| 21          | TTGTCGAGTACCCATC-CCAACATTCAGGCAGTTTCAATTT<br>CTCAAGTTTATCCAATGCCAGGTTTAGGTAATAAACAATTTGAGTACA--ATCCTACAGAT-C-GG--GTTTTCAATTTACATAGAATGTTTGAAGCAATATAAAGATATAATTTAG                                  | 12              |
| 22          | TTGTCGAGTACCCATC-CCAACATTCAGGCAGTTTCAATTT<br>GCCAGCTCAATCGTATCCAACTCCAGCTTTTAGGTAACACTTAAGATTTAAATTTGTCAGTACGTAAACCATTCTGGCAGATTTTGAATCAAACCTAAGATAAAACCTCCACAG                                     | 12              |
| 23          | TTGTCGAGTACCCATC-CCAACATTCAGGCAGTTTCAATTT<br>CAATGTCCAGCTCAGGCTTTCCGGTTCGGTTTATAGGTAATTTGTCAGTGCCTGGTTCCTTATTCATGTAGTTTCAATTTGGTCTATAGTGTCTACGTAATTCGGCACTGTTTCCAG                                  | 17              |
| 24          | TTGTCGAGTACCCATC-CCAACATTCAGGCAGTTTCAATTT<br>GCACAGTCTTTCCAGTCCCGTTTATAGGTTGGTCAATTTGTCAGGCTCTTTACATCCAACTTTCAGGCAGTCGAGGCAGTTCATCCATCATAAATCTCATCTTAAATTTGTAG                                      | 11              |
| 25          | TTGTCGAGTACCCATC-CCAACATTCAGGCAGTTTCAATTT<br>CCCCTCCGCTGCAAAACTTAGTTGAATGACAGGTCGCTTCCAAATTTGTCAGTCCCTTGGCAGTTTCAATTCAGCAGCGGTTTTCGGTCTCATCCCACTTCCATTGCTTCCAG                                      | 13              |
| 26          | TTGTCGAGTACCCATC-CCAACATTCAGGCAGTTTCAATTT<br>TATTTTCCCGCCCAATCCTATCCGGTTCCTGATTCAGGTGAGCCCATCCATTTCCTCAGGCAGTTTCACTAGACTTCGGTTAGCTGGCACTTCAATATTCATTATCTTTCAG                                       | 15              |
| 27          | TTGTCGAGTACCCATC-CCAACATTCAGGCAGTTTCAATTT<br>CTTTTGTCCAGCTCAATCGTATCCGGTACCCTGTTAGGTAATCCCAAGTTCCTCAGGCAGTTCCTCAACTGACTTTTAAATCTCAAATGTTTACTAAATGGCAATCTCTTTAG                                      | 13              |
| 28          | TTGTCGAGTACCCATC-CCAACATTCAGGCAGTTTCAATTT<br>CTTACCCCTCTTTTCCCGTCAAGCCTATCCAGTACCCTTCTTTAGGTAATCCCTACGATTTTAGGCAGTTTCCCGTTTACTTAGTTCTAGTGTGTATACCCCTGTTTATAG                                        | 13              |
| 29          | TTGTCGAGTACCCATC-CCAACATTCAGGCAGTTTCAATTT<br>TGTCAGCCAGGCATATCCGGTACCATTCTCAGGTGATTCTGCTCAGACATTCAGGCAGTTTAAAGTTATGGCTGTCTTGGAGTGAATCGTTATGGAATATTATGATTTATGTTTCAG                                  | 15              |
| 30          | TTGTCGAGTACCCATC-CCAACATTCAGGCAGTTTCAATTT<br>TCTAATAATGTCTCCGAGGTTTCCCGTCCAGCTTTTAGGTAAGTCCAACTTCAGGCAGTTTCAATTAACAATAGTTTCTTGGTAAATGGTGTATTAACCTTTTATAG                                            | 19              |
| 31          | TTGTCGAGTACCCATC-CCAACATTCAGGCAGTTTCAATTT<br>CTACCCGGTGCCTGTGTTAGGTAATCAAAGCGAAAGATTGGGAATCAGGTCAATATTCAGGCAGTTTGTATGGAGTTGTTAGGCTCTTATAGTCGAAATGAAATCTTTTTCAG                                      | 14              |
| 32          | TTGTCGAGTACCCATC-CCAACATTCAGGCAGTTTCAATTT<br>TCCGTTTCTTCCAAATAGGAAATACATTTTGTCTTCTATGATTTCCA-CATTCAGCAGTTCGCGCACTTACTCTCTTAACTTTTGAATTTGTAACCTTTGCTTTTCAG                                           | 14              |
| 33          | TTGTCGAGTACCCATC-CCAACATTCAGGCAGTTTCAATTT<br>GTTCTACAGATTTCTGAGGGCCCTGAAACCAACAT-CAGGCTTGGTTTTGATTTCTTTTACATAGAAACACTATAAACTATAAACAAGTTAAATCCATATACATATGATACGTATGATAG                               | 14              |
| 34          | TTGTCGAGTACCCATC-CCAACATTCAGGCAGTTTCAATTT<br>TTTCTAGATTTCCCTCAGAGATGAAGTAACAAATAAATAGGTAAGTTCAGCCTTAGACCAACAT-CAGGCTGGGATATCGATCCATAAAGAACTTACCATAATCTCTTCCAG                                       | 11              |
| 35          | TTGTCGAGTACCCATC-CCAACATTCAGGCAGTTTCAATTT<br>ACTGTGTTTATTGCGCTTACCAATACCAGTAGAAGATCCCTTATAGCAAGCTTACTTCTATCCCATACATTCGCAATGTCGGATAGATTCTAATACTGCCATCATCCACAG                                        | 14              |
| 36          | TTGTCGAGTACCCATC-CCAACATTCAGGCAGTTTCAATTT<br>GTGAAAGTTTGTGCTTGCATTAATGAAAGTATTGATGACTTTCGTCAGCCCAAGCAGCATTCAGTTCAGTTTATTGTTGCGTTTAGCTTAATTAATGGGTGACTTAATTCACAG                                     | 13              |
| 37          | TTGTCGAGTACCCATC-CCAACATTCAGGCAGTTTCAATTT<br>CCAAGCCTTTCCAGTCCCATCATTAGGTAAGCCCACTTCAGGCAGTTTGAAGTTACTAGTGTATGATTTTTGGAACACAATTAATCAGAATGCCAATTTAATAAATTTCCAG                                       | 16              |
| 38          | TTGTCGAGTACCCATC-CCAACATTCAGGCAGTTTCAATTT<br>TTTTAGGTATATACAATTTTTGGTTGAAGAAAGTAAGTACGGCCGAAATTTAGCAGTCCAGAGGATTTAGATGGAATTTGGTCTTTAGAGTTAAAATTTACGTAACTTTTCAG                                      | 10              |
| 39          | TTGTCGAGTACCCATC-CCAACATTCAGGCAGTTTCAATTT<br>ATTCAAATATACTCCACTTCTTATGTTAAAATGGTTCAGCTGTGATAAACCATTTTCAGTTCAGTTTCAATTTAAGTGCATTTTCCCTTAAATAATGATTTCAACTTTTATAG                                      | 17              |
| 40          | TTGTCGAGTACCCATC-CCAACATTCAGGCAGTTTCAATTT<br>CAATCCTATCCCTGTAACAATATTAAAGTA--TTCAATTTCAATCCAACGCTGTTCAACTGTTCTGTTAGGTTTCAATAGAAATTAATGCCAAAGACATATTACATTTATCTATTATAG                                | 11              |
| 41          | TTGTCGAGTACCCATC-CCAACATTCAGGCAGTTTCAATTT<br>AGCGGTGATTAAGGCAGCTTTGCTCTTTTGTGCCAGCTCAGGCTTCCCGTTCCTCATTT-AGGTAAGTTTCAGCAAAACAGGCTTCTAGGTTAATCTCTTTAAAACATTCAG                                       | 13              |
| 42          | TTGTCGAGTACCCATC-CCAACATTCAGGCAGTTTCAATTT<br>CGATGCTTTGCCAGGCGCAGGCTTTTCCACTGCCATAATGAGTTAGCCTTGTATCCGCTGTAATTCAGGCAGTTTCAATAGAGATTAGTCACTTTTAAATTTGTTAATTTATTTTCAG                                 | 14              |
| 43          | TTGTCGAGTACCCATC-CCAACATTCAGGCAGTTTCAATTT<br>TTGTCAGGCTCAGGCATATCCAGTCCCATATGAGGTTAGATATAAATACTTTAGCAT-CAGGCAGTTTCCCATATACAAATCCCTTGAACATAAAGTTCCAAGTCAATGTTTTCAG                                   | 13              |
| 44          | TTGTCGAGTACCCATC-CCAACATTCAGGCAGTTTCAATTT<br>CTCAGGCTATCCAGTTCGGCTATGAGTACTACATGACCTAAACCAACCTATTTCAGGCAGTTAATTAAGCAGCCTCAAACAATCTTAAGTTTCCAAATTTATTCGAATTTTCAG                                     | 11              |
| 45          | TTGTCGAGTACCCATC-CCAACATTCAGGCAGTTTCAATTT<br>CTACTCGGCTCGAGTTCGAGTATTTGTGCTACTTTGCCAGGCTCAGGCTTTTCCAGTTCCCTATACACGTAATTGCAGTTCAGGCAGCTTAGAAGCCTTTCTTTCTTTACTAG                                      | 10              |
| 46          | TTGTCGAGTACCCATC-CCAACATTCAGGCAGTTTCAATTT<br>GAGTACCTATCCCAACATTCAGGCAGTTTCAATTT<br>TCGCGTACTCTGCCAGGCGCAGGC-GTATCCAGTCCATTGATAAGGTAGCAATAAGTACTAAGACTACAACATCAATAAGTCCCATAAGAAGCATATTGTTACTTTTGTAG | 6               |
| 47          | TTGTCGAGTACCCATC-CCAACATTCAGGCAGTTTCAATTT<br>ACTAGTTTCCGCTTTTGTGCCAGGCGCAGGCTTTCCAGTACCATATCAGGTTAGTCCCAACTTCGGGCA-TATCCAAATTAGACAGAGGGCCATTTTACGTAAGTCTGATTCAG                                     | 15              |
| 48          | TTGTCGAGTACCCATC-CCAACATTCAGGCAGTTTCAATTT<br>CTTGGGCAATGTTTTCCACACCCCACTTTAGGTAATGAAAGCTATTTATCAGAGCCAACTTCAGGCAGCAAAATAGCATTTCAAATAGGATCTTACAGAATTTGCTTTGATTTTCAG                                  | 15              |
